# Supplementary material
Source: PubMed Central journal article supplement (PMC10274196)
Supplement: S1368980020002645sup001.pdf [file S1368980020002645sup001.pdf]

**March/April 2019 (adapted BTG-FSOF)**

Location: several locations possible  
 Price: cheapest option available, no sale  
 Q = Quality, a=good, b=OK, c=bad (1=yes, 0=no)  
 No. potato chips, cereals, SSBs: all varieties, pack sizes, flavors counted  
 Availability: yes=1, no=0

**grey fields to fill in**

|    | Supermarket         |                           |                 |         | Name | Name |
|----|---------------------|---------------------------|-----------------|---------|------|------|
|    | City (c)/Suburb (s) |                           |                 |         |      |      |
|    | Location            |                           |                 |         |      |      |
|    | Date                |                           |                 |         |      |      |
|    | weekday             |                           |                 |         |      |      |
|    | Time                |                           |                 |         |      |      |
|    | Walking direction   |                           |                 |         |      |      |
|    | Information         |                           |                 |         |      |      |
|    |                     |                           |                 |         |      |      |
| No | Element             | sub-points                | questions       | Quality |      |      |
|    | Fruits              | Location in Supermarket   |                 |         |      |      |
| 1  | Fruits              | Variety of fruits         |                 |         |      |      |
| 1  | Fruits              | Number of organic options |                 |         |      |      |
| 1  | Fruits              | % organic                 |                 |         |      |      |
| 1  | Fruits              |                           |                 |         |      |      |
| 1  | Fruits              | Apples                    | Number of types |         |      |      |
| 1  | Fruits              |                           | Price/lbs (\$)  |         |      |      |
| 1  | Fruits              |                           | Quality         | a       |      |      |
| 1  | Fruits              |                           |                 | b       |      |      |
| 1  | Fruits              |                           |                 | c       |      |      |
| 1  | Fruits              |                           |                 |         |      |      |
| 1  | Fruits              | Pears                     | Number of types |         |      |      |
| 1  | Fruits              |                           | Price/lbs (\$)  |         |      |      |
| 1  | Fruits              |                           | Quality         | a       |      |      |
| 1  | Fruits              |                           |                 | b       |      |      |
| 1  | Fruits              |                           |                 | c       |      |      |
| 1  | Fruits              |                           |                 |         |      |      |
| 1  | Fruits              | Bananas                   | Number of types |         |      |      |
| 1  | Fruits              |                           | Price/lbs (\$)  |         |      |      |
| 1  | Fruits              |                           | Quality         | a       |      |      |

|     |            |                           |                         |   |  |  |
|-----|------------|---------------------------|-------------------------|---|--|--|
| 1   | Fruits     |                           |                         | b |  |  |
| 1   | Fruits     |                           |                         | c |  |  |
| 1   | Fruits     |                           |                         |   |  |  |
| 1   | Fruits     | Grapes                    | Number of types         |   |  |  |
| 1   | Fruits     |                           | Price/lbs (\$)          |   |  |  |
| 1   | Fruits     |                           | Quality                 | a |  |  |
| 1   | Fruits     |                           |                         | b |  |  |
| 1   | Fruits     |                           |                         | c |  |  |
| 1   | Fruits     |                           |                         |   |  |  |
| 1   | Fruits     | Citrus Fruits             | Number of varieties     |   |  |  |
| 1   | Fruits     |                           | Numer of ORANGE types   |   |  |  |
| 1   | Fruits     |                           | Price/lbs [\$] (orange) |   |  |  |
| 1   | Fruits     |                           | Quality                 | a |  |  |
| 1   | Fruits     |                           |                         | b |  |  |
| 1   | Fruits     |                           |                         | c |  |  |
| 1   | Fruits     |                           |                         |   |  |  |
| 1   | Fruits     | Comments                  |                         |   |  |  |
|     |            |                           |                         |   |  |  |
| 2   | Vegetables | Location in Supermarket   |                         |   |  |  |
| 2   | Vegetables | Variety of vegetables     |                         |   |  |  |
| 2   | Vegetables | Number of organic options |                         |   |  |  |
| 2,0 | Vegetables | % organic                 |                         |   |  |  |
| 2   | Vegetables |                           |                         |   |  |  |
| 2   | Vegetables | Tomatoes                  | Number of types         |   |  |  |
| 2   | Vegetables |                           | Price/lbs [\$]          |   |  |  |
| 2   | Vegetables |                           | Quality                 | a |  |  |
| 2   | Vegetables |                           |                         | b |  |  |
| 2   | Vegetables |                           |                         | c |  |  |
| 2   | Vegetables |                           |                         |   |  |  |
| 2   | Vegetables | Cucumber                  | Number of types         |   |  |  |
| 2   | Vegetables |                           | Price/each [\$]         |   |  |  |
| 2   | Vegetables |                           | Quality                 | a |  |  |
| 2   | Vegetables |                           |                         | b |  |  |
| 2   | Vegetables |                           |                         | c |  |  |
| 2   | Vegetables |                           |                         |   |  |  |
| 2   | Vegetables | Peppers (w/o chili)       | Number of types         |   |  |  |
| 2   | Vegetables |                           | Price/lbs [\$]          |   |  |  |
| 2   | Vegetables |                           | Quality                 | a |  |  |

|   |              |                                           |                         |   |  |  |
|---|--------------|-------------------------------------------|-------------------------|---|--|--|
| 2 | Vegetables   |                                           |                         | b |  |  |
| 2 | Vegetables   |                                           |                         | c |  |  |
| 2 | Vegetables   |                                           |                         |   |  |  |
| 2 | Vegetables   | Salad                                     | Number of types         |   |  |  |
| 2 | Vegetables   |                                           | Number of ready to eat  |   |  |  |
| 2 | Vegetables   |                                           | Price/head iceberg [\$] |   |  |  |
| 2 | Vegetables   |                                           | Quality                 | a |  |  |
| 2 | Vegetables   |                                           |                         | b |  |  |
| 2 | Vegetables   |                                           |                         | c |  |  |
| 2 | Vegetables   |                                           |                         |   |  |  |
| 2 | Vegetables   | Carrots                                   | Number of types         |   |  |  |
| 2 | Vegetables   |                                           | Price/lbs [\$]          |   |  |  |
| 2 | Vegetables   |                                           | Quality                 | a |  |  |
| 2 | Vegetables   |                                           |                         | b |  |  |
| 2 | Vegetables   |                                           |                         | c |  |  |
| 2 | Vegetables   |                                           |                         |   |  |  |
| 2 | Vegetables   | Comments                                  |                         |   |  |  |
|   |              |                                           |                         |   |  |  |
| 3 | Potato Chips | Location in Supermarket                   |                         |   |  |  |
| 3 | Potato Chips | Numer of potato chips                     |                         |   |  |  |
| 3 | Potato Chips | Price/5oz [\$] (home brand)               |                         |   |  |  |
| 3 | Potato Chips | Comments                                  |                         |   |  |  |
|   |              |                                           |                         |   |  |  |
| 4 | Cereals      | Location in Supermarket                   |                         |   |  |  |
| 4 | Cereals      | Number of cereals                         |                         |   |  |  |
| 4 | Cereals      | Price/lbs [\$] (Corn Flakes - Kellogs)    |                         |   |  |  |
| 4 | Cereals      | Price/lbs [\$] (Frosties - Kellogs)       |                         |   |  |  |
| 4 | Cereals      | Price/lbs [\$] (Corn Flakes - home brand) |                         |   |  |  |
| 4 | Cereals      | Price/lbs [\$] (Frosties - home brand)    |                         |   |  |  |
| 4 | Cereals      | Comments                                  |                         |   |  |  |
|   |              |                                           |                         |   |  |  |
| 5 | SSBs         | Location in Supermarket                   |                         |   |  |  |
| 5 | SSBs         | Numer of different SSBs                   |                         |   |  |  |
| 5 | SSBs         | Numer of different SS-fruit nectars       |                         |   |  |  |
| 5 | SSBs         | Numer of different SS-energy drinks       |                         |   |  |  |
| 5 | SSBs         | Size of greatest bottle [l]               |                         |   |  |  |
| 5 | SSBs         | Price/l [\$] (Cola, cheapest)             |                         |   |  |  |
| 5 | SSBs         | Comments                                  |                         |   |  |  |
